# Supplementary figures and images for: Host-Specific Interplay between Foot-and-Mouth Disease Virus 3D Polymerase and the Type-I Interferon Pathway
Source: MDPI journal article supplement (doi:10.3390/v15030666), 2023-03-01

(a)

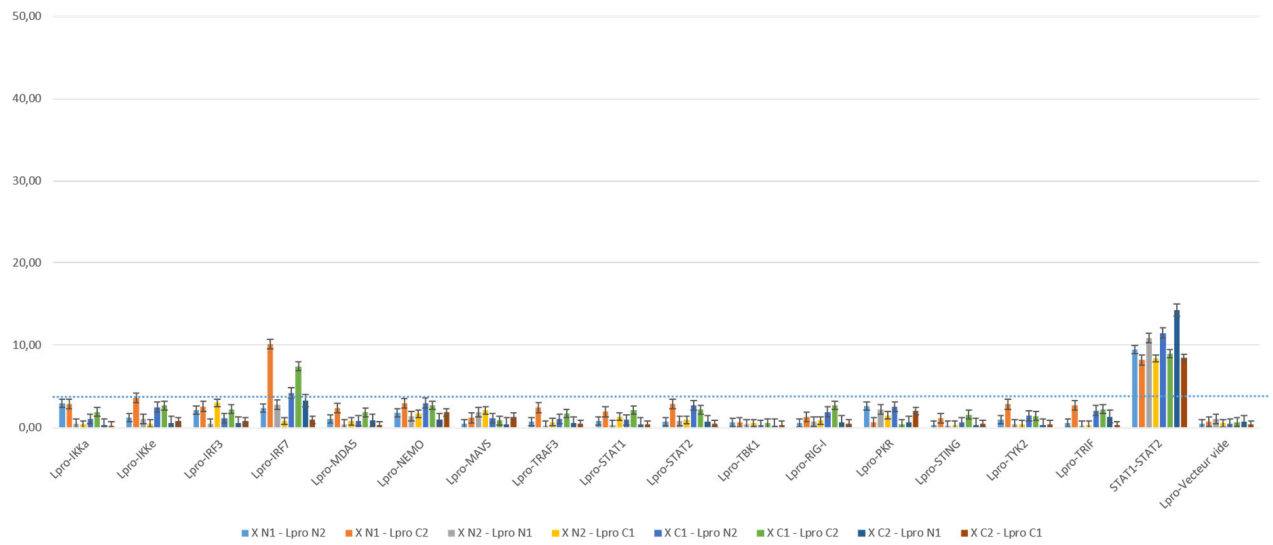

(b)

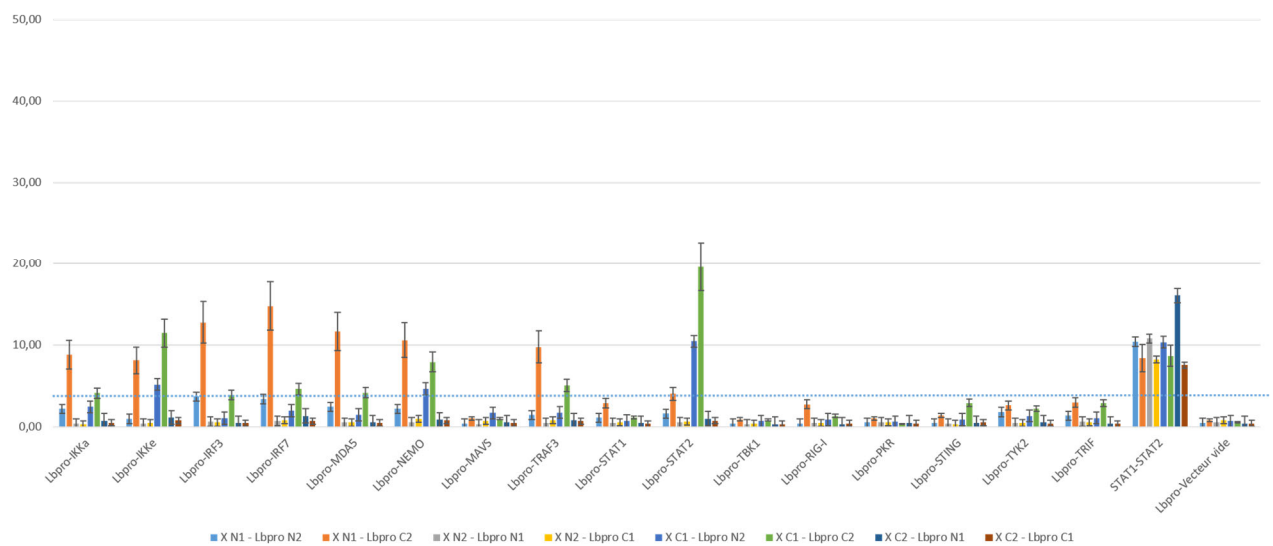

(c)

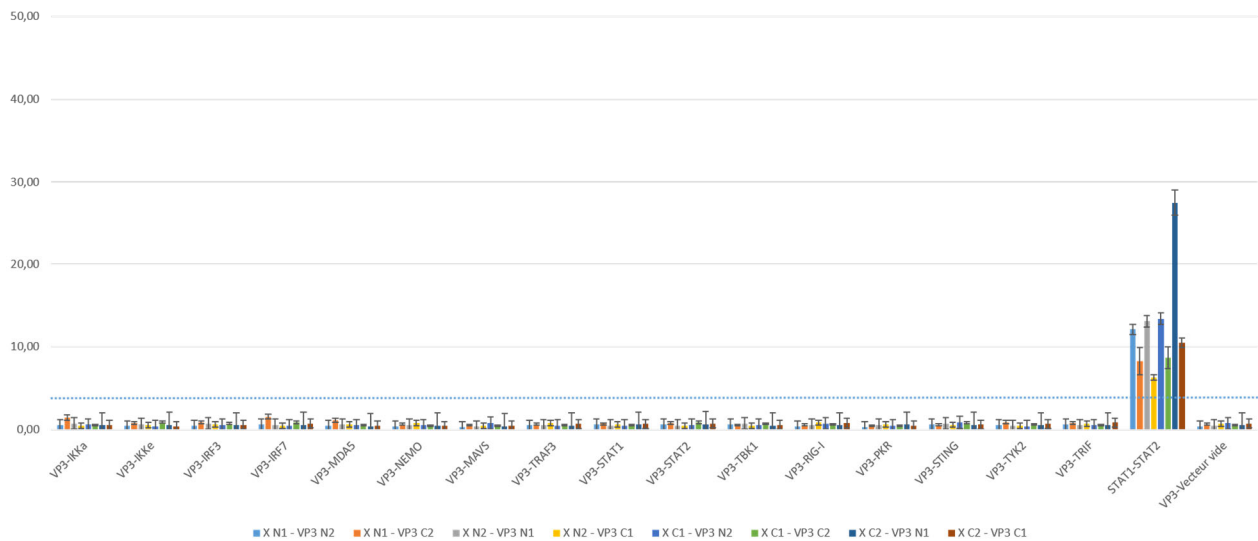

(d)

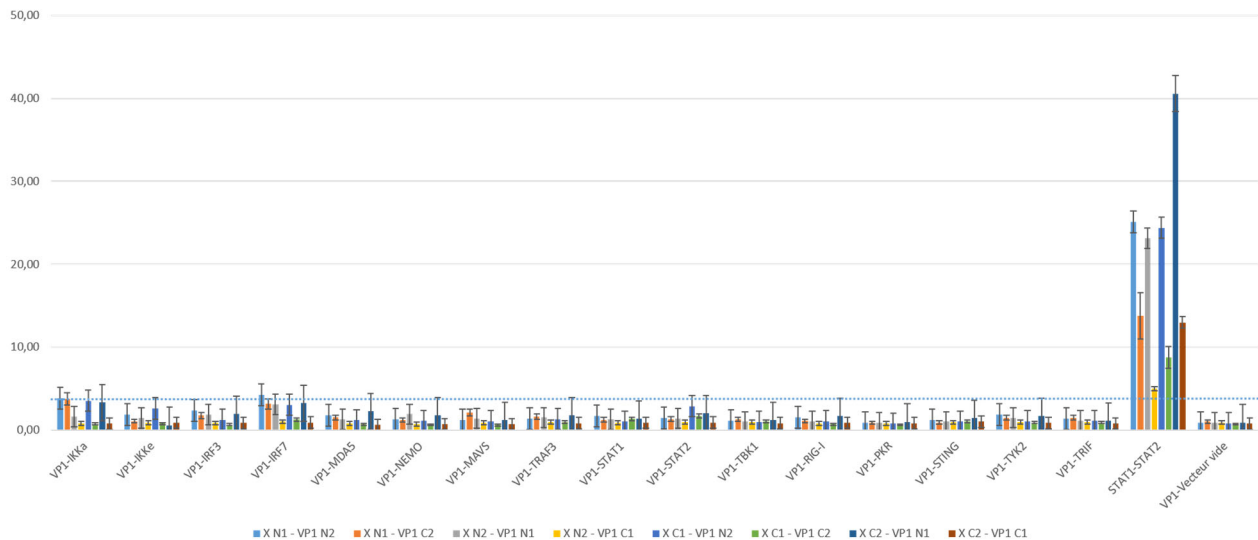

(e)

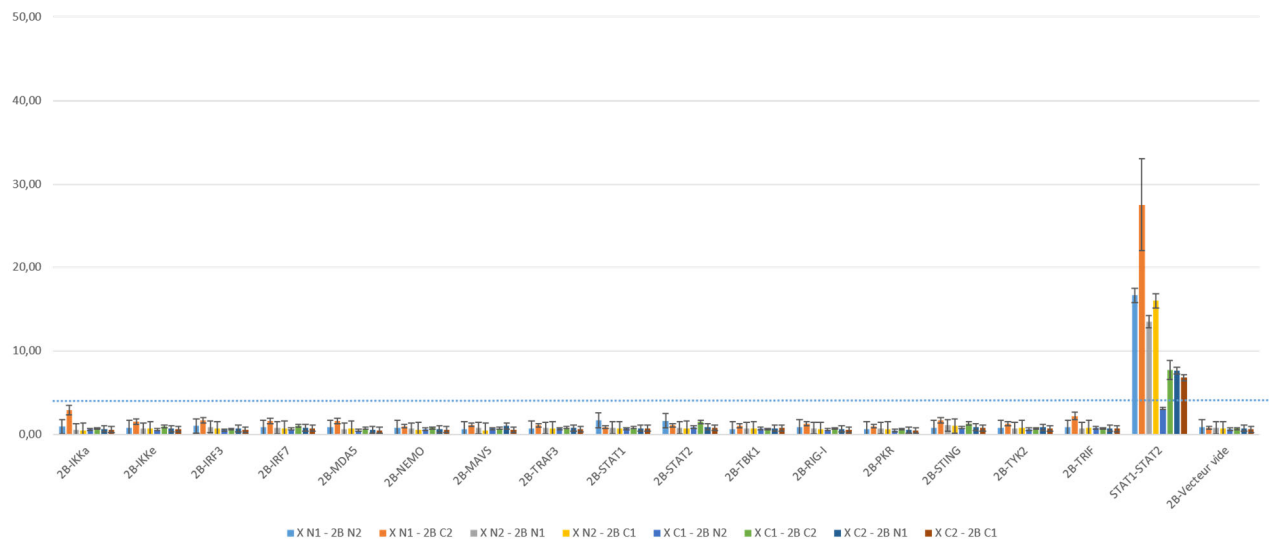

(f)

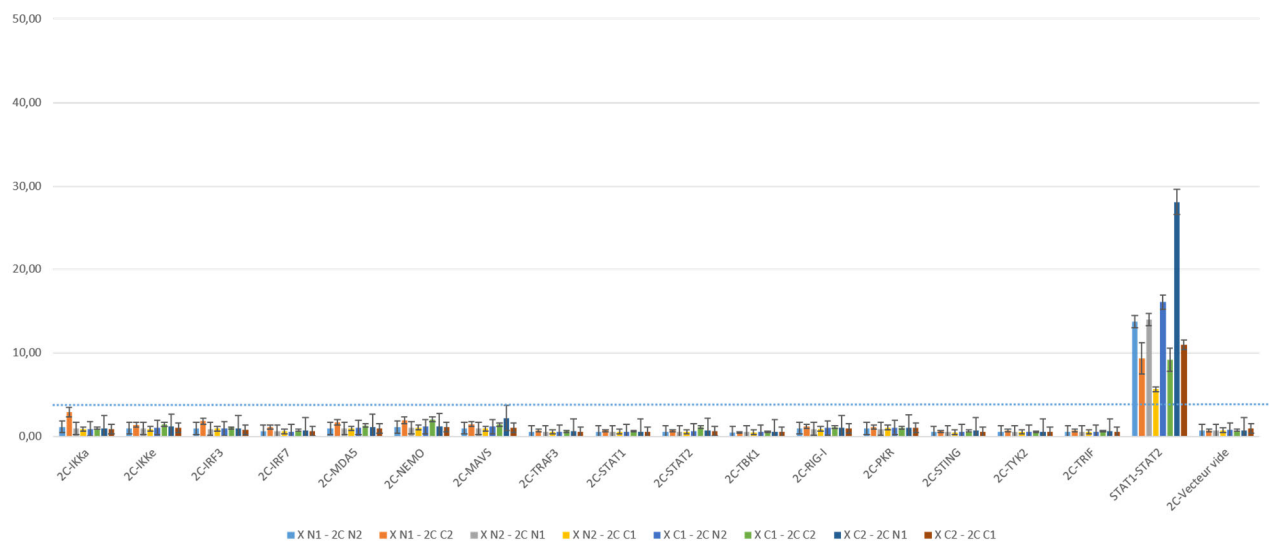

(g)

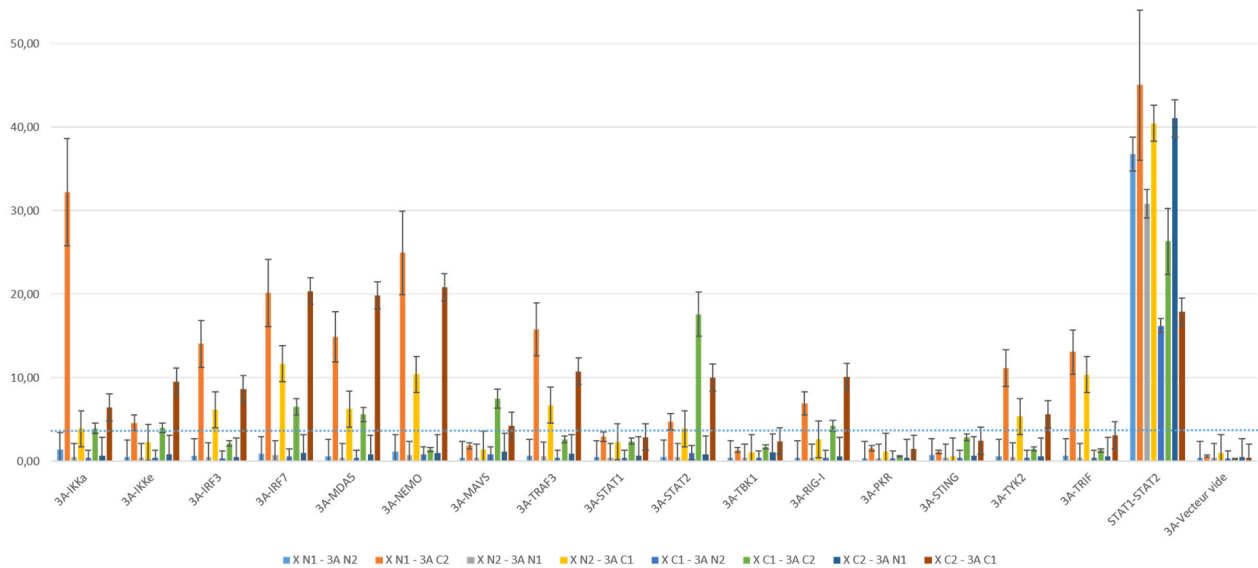

(h)

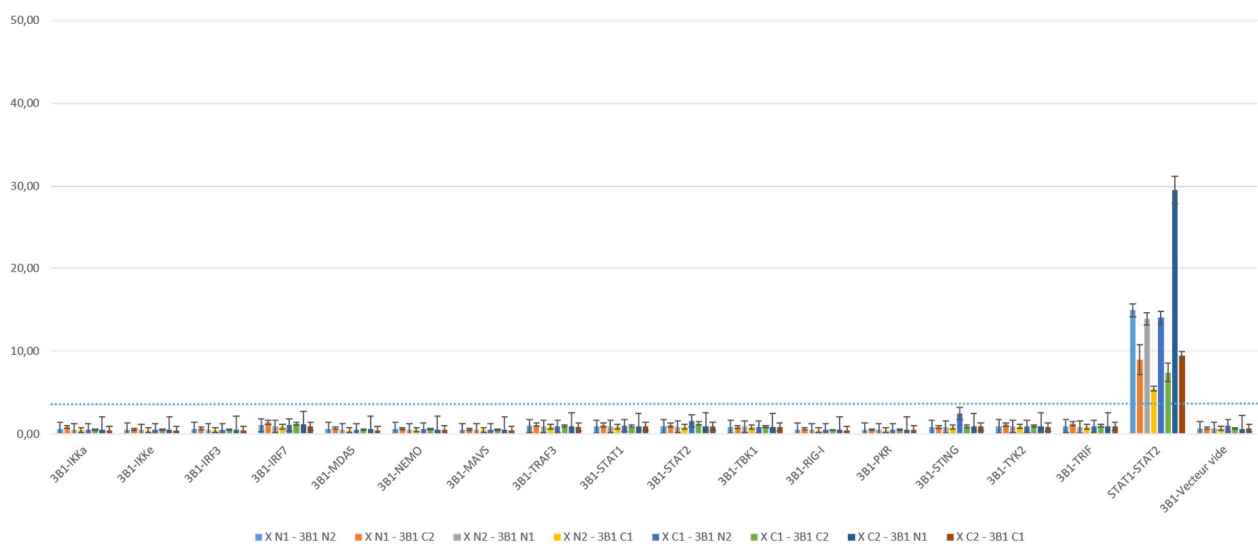

(i)

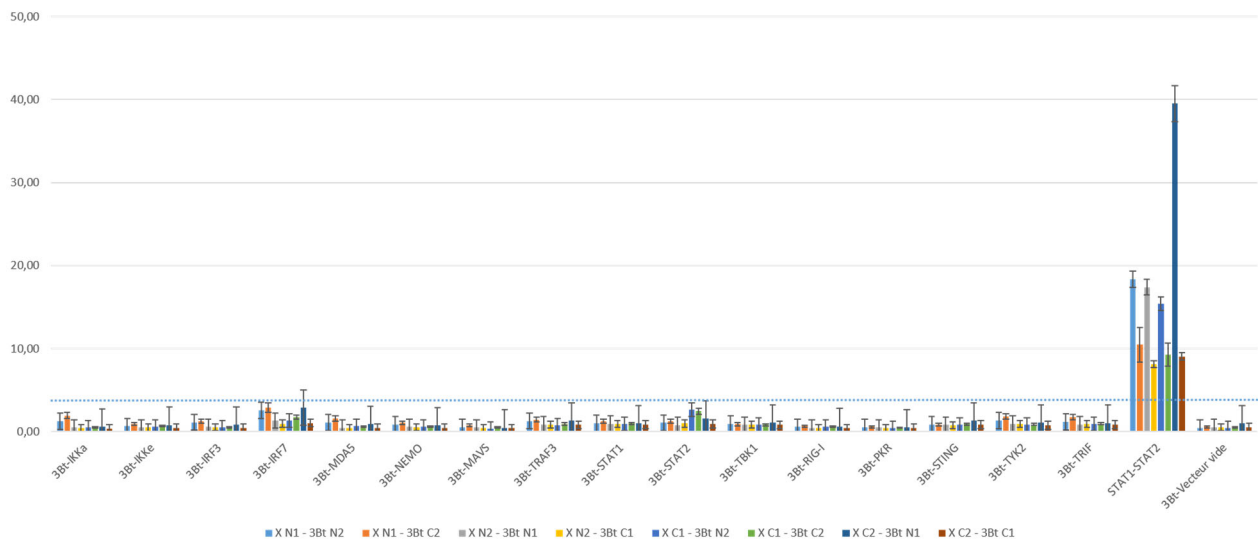

(j)

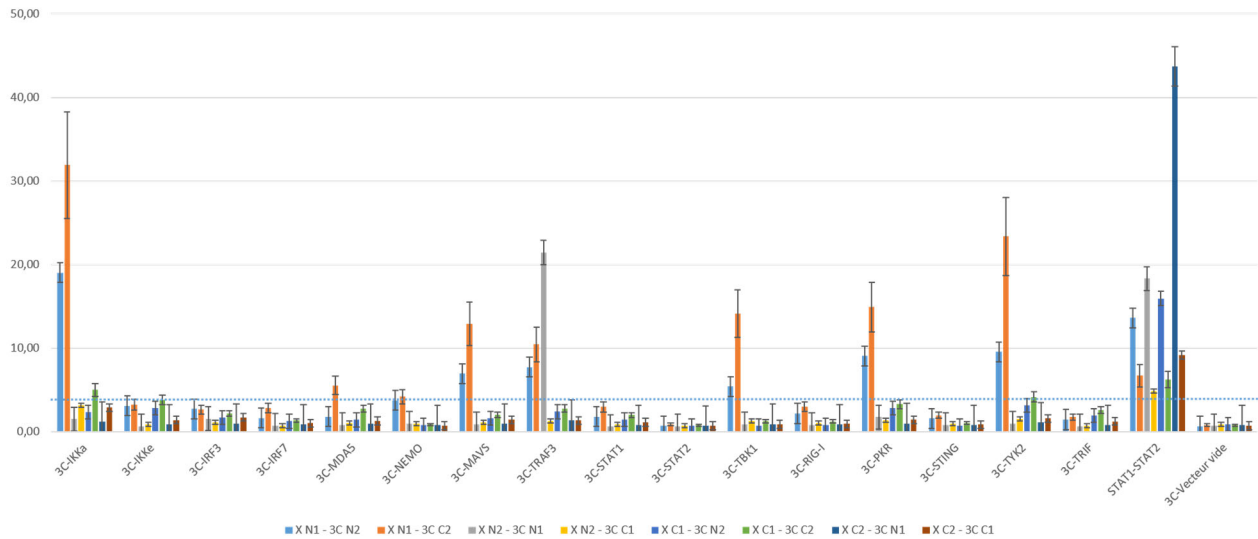

Supplement: s1 [file s1]

(a)

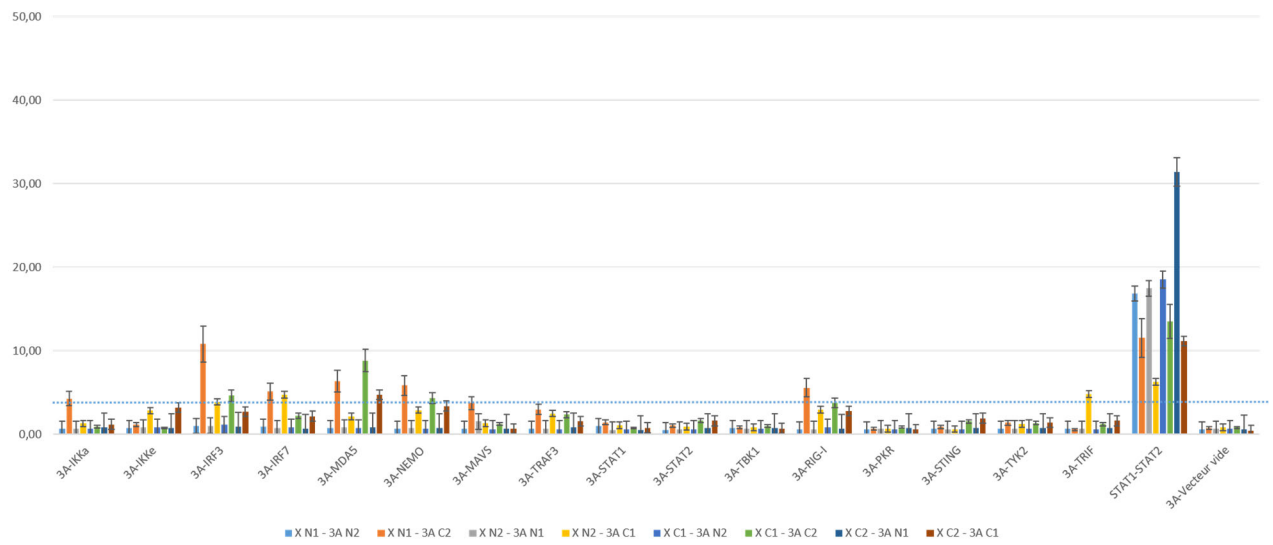

(b)

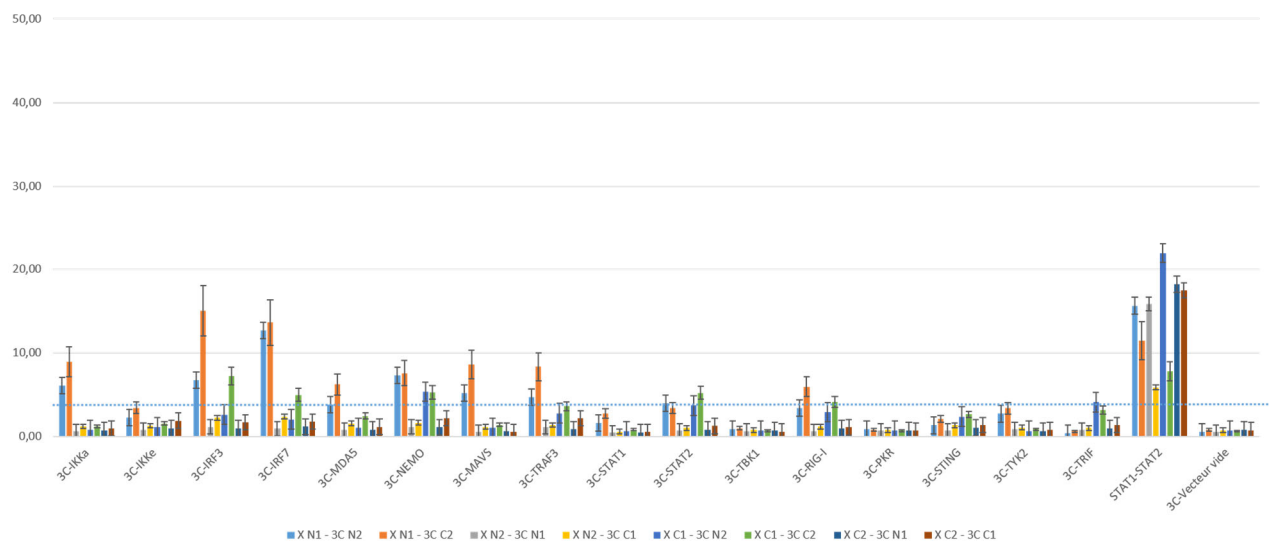

Supplement: s1 [file s1]
